# Supplementary material
Source: PubMed Central journal article supplement (PMC3190925)
Supplement: supp_M111.265637_jbc.M111.265637-1.pdf [file supp_M111.265637_jbc.M111.265637-1.pdf]

## SUPPLEMENTAL MATERIAL

Table S1. PCR primer sequences for gene expression assays

| Gene         | Primer sequence (5' to 3')                                          |
|--------------|---------------------------------------------------------------------|
| <i>Has2</i>  | For- CAGAATCCAAACAGACAGTTC<br>Rev- TAAGGTGTTGTGTGTGACTGA            |
| <i>Gfat1</i> | For- GGA TAT GAT TCT GCT GGT GTG<br>Rev- CCA ACG GGT ATG AGC TAT TC |
| <i>YY1</i>   | For- GGAGGAATACCTGGCATTGA<br>Rev- TTCTGCACAGACGTGGACTC              |
| <i>SP1</i>   | For- GGAGAGCAAAACCAGCAGAC<br>Rev- AAGGTGATTGTTTGGGCTTG              |
| <i>RPLP0</i> | For- AGATGCAGCAGATCCGCAT<br>Rev- GTGGTGATACCTAAAGCCTG               |

Table S2: Location of the PCR primer sequences specific for the nine human *Has2* promoter regions schematically shown in Fig. 5 and analyzed for transcription factor binding in Fig. 6.

| Gene        | Region | Location       | Primer sequence (5' to 3') |
|-------------|--------|----------------|----------------------------|
| <i>Has2</i> | 1      | -32 to +57     | GGAGGCAGAAGGGCAACAAC       |
|             |        |                | GTTCAATGGGCTGCTCGAAGC      |
|             | 2      | -246 to -12    | CATTGGAGTTAGAACCGGCC       |
|             |        |                | GTTGTTGCCCTTCTGCCTCC       |
|             | 3      | -481 to -244   | GTTACTTAGCTGAAGGGCACC      |
|             |        |                | GGCCGGTTCTAAACTCCAATG      |
|             | 4      | -675 to -460   | GGCTTTGACACTTGACGTCAG      |
|             |        |                | GGTGCCCTTCAGCTAAGTAAC      |
|             | 5      | -1048 to -655  | CAGTCATCAGCAGGCTTGTTG      |
|             |        |                | CTGACGTCAAGTGTCAAAGCC      |
|             | 6      | -1338 to -1027 | GTGCGACGTGATGAAAGCATC      |
|             |        |                | CAACAAGCCTGCTGATGACTG      |
|             | 7      | -1613 to -1318 | CACCTAGGCGGAGTTCAAAC       |
|             |        |                | GATGCTTTCATCACGTCGCAC      |
|             | 8      | -1896 to -1554 | GGTATTCCCGCATTACGTGTC      |
|             |        |                | CACTGATTTCCCCCAGCAAC       |
|             | 9      | -2250 to -1874 | CTCCTGGGATCTCACAAACAG      |
|             |        |                | GACACGTAATGCGGGAATACC      |

Table S3: SiRNA sequences for the gene silencing experiments

| Gene                     | siRNA sequences (5' to 3')                                                                                                               |
|--------------------------|------------------------------------------------------------------------------------------------------------------------------------------|
| <i>Nonsense/ Control</i> | UGCUCUACGAUCGACGAUG                                                                                                                      |
| <i>GFAT1</i>             | GGAGGAUACUGAGACCAU                                                                                                                       |
| <i>YY1</i>               | <ol style="list-style-type: none"> <li>1. CCUCCUGAUUAUUCAGAAU</li> <li>2. GAACUCACCUCUGAUUAU</li> <li>3. GGCUGCACAAAGAUGUUCA</li> </ol>  |
| <i>SPI</i>               | <ol style="list-style-type: none"> <li>1. CCUGGAGUGAUGCCUAAUA</li> <li>2. CCAACAGAUUAUCACAAAU</li> <li>3. CCAGCAACAUGGGAAUUAU</li> </ol> |

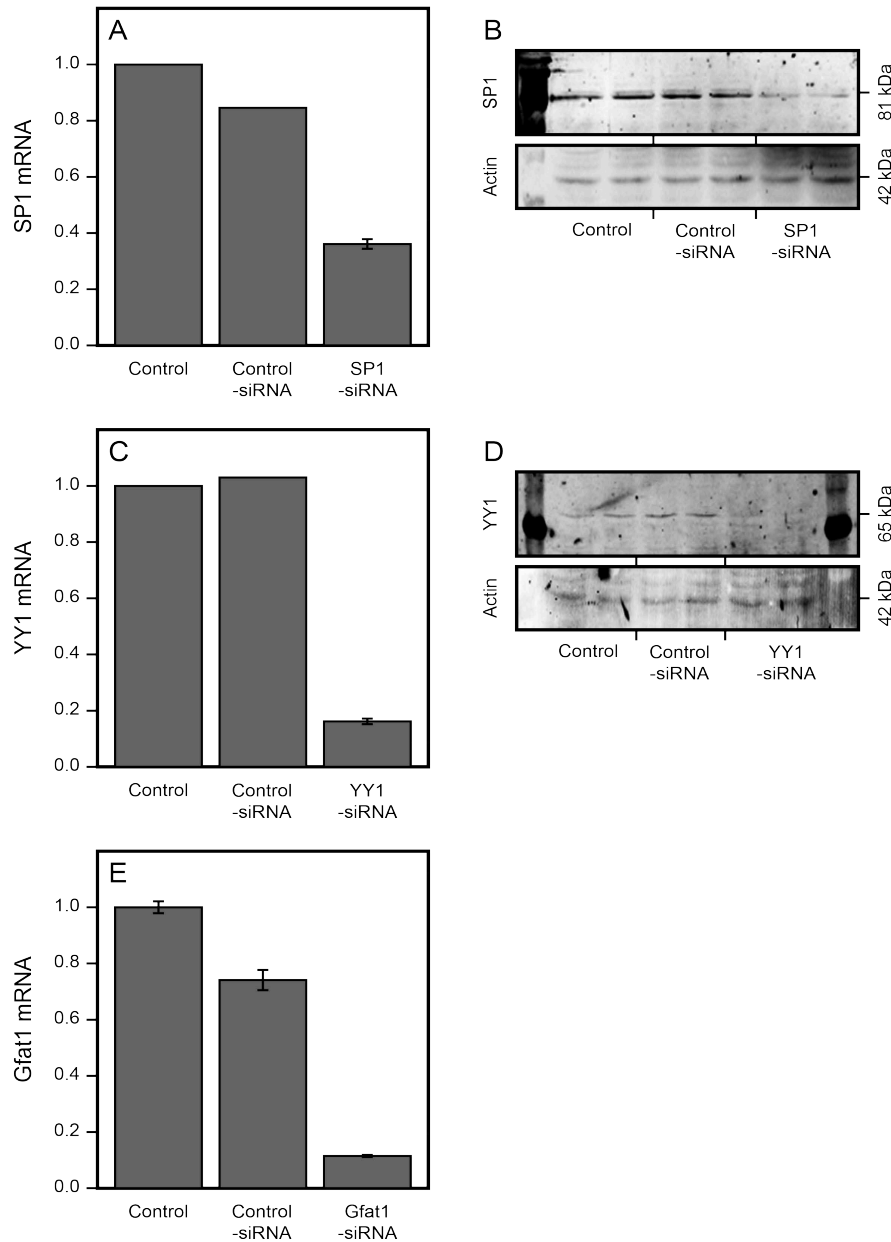

Supplement figure 1

**Fig. S1.** Efficiency of siRNAs. The siRNAs to block GFAT1, YY1 and SP1 (30 nM, table S3) were transfected to the HaCaT cells with Lipofectamine 2000. After transfection the cells were cultured for 48 h and mRNA and protein levels were analyzed. mRNA levels were normalized to the *RPLP0* control gene as described in Methods, and protein levels were compared to  $\beta$ -actin band (42 kDa). Three different *SP1*-siRNA sequences were tested, the data represent their average inhibition efficiency  $\pm$  SE (A). The corresponding change in SP1 protein is shown in (B). To reduce *YY1* mRNA level, three different *YY1*-siRNA sequences were tested, their efficiencies (mean  $\pm$  SE) are shown in (C), and the levels of YY1 protein in (D). *GFAT1*-siRNA efficiency was analyzed only at mRNA level because specific antibodies were unavailable for GFAT1-protein. The means  $\pm$  SE shown are from three experiments (E).
